# Supplementary material for: Two photochemical pathways in competition: matrix isolation, time-resolved and NMR studies of cis-[Ru(PMe3)4(H)2]
Source: Royal Society of Chemistry journal article supplement (doi:10.1039/b002297g), 2000-01-01
Supplement: b002297g-s1.doc [file b002297g-s1.doc]

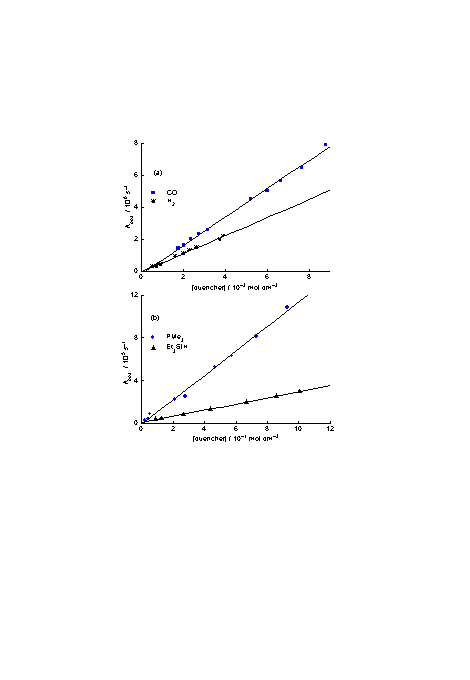


**Fig. S1** Plots of the pseudo-first order rate constants *vs* concentration of quencher measured from decay of transient in laser flash photolysis experiments. (a) Quencher = CO, H2. (b) Quencher = PMe3, Et3SiH.
